# Supplementary material for: FoxD2-AS1 promotes glioma progression by regulating miR-185-5P/HMGA2 axis and PI3K/AKT signaling pathway
Source: publisher site journal article supplement (doi:10.18632/aging.101843), 2019-03-11
Supplement: Supplementary file 1 [file aging-v11i5-101843-supplementary-material-SD1.pdf]

## SUPPLEMENTARY TABLE

**Supplementary Table 1. Clinical parameters of glioma patients (n = 48).**

| Parameter                          |        | Number of patients (n) | Percentage of patients (%) |
|------------------------------------|--------|------------------------|----------------------------|
| Gender                             | Female | 30                     | 62.5%                      |
|                                    | Male   | 18                     | 37.5%                      |
| Age at diagnosis (years)           | ≤60    | 25                     | 52.1%                      |
|                                    | >60    | 23                     | 47.9%                      |
| Time from initial symptoms (weeks) | ≤4     | 36                     | 75%                        |
|                                    | >4     | 12                     | 25%                        |
| Karnofsky Performance Scale.       | <70    | 22                     | 45.8%                      |
|                                    | ≥70    | 26                     | 54.2%                      |
| Tumor size (mm)                    | <55    | 29                     | 60.4%                      |
|                                    | ≥55    | 19                     | 39.6%                      |
| WHO classification                 | II     | 19                     | 39.5%                      |
|                                    | III    | 15                     | 31.3%                      |
|                                    | IV     | 14                     | 29.2%                      |
| Extent of tumor resection          | ≥90%   | 43                     | 89.6%                      |
|                                    | <90%   | 5                      | 10.4%                      |
